# Supplementary material for: Antidepressant discontinuation before or during pregnancy and risk of psychiatric emergency in Denmark: A population-based propensity score–matched cohort study
Source: PubMed Central journal article supplement (PMC8843130; doi:10.1371/journal.pmed.1003895), 2022-01-31
Supplement: pmed.1003895.s004.pdf [file pmed.1003895.s004.pdf]

### **S3. Definition of suicide attempts**

Suicide attempts before antidepressant discontinuation were defined as inpatient or outpatient contact of suicide attempts identified from the Danish Psychiatric Central Research Register and the Danish National Patient Register [1]. Individuals were considered to have made a suicide attempt if they fulfilled one of the following criteria:

- (1) The main diagnosis of suicide attempt or deliberate self-harm (ICD-8 code: E950–E959; ICD-10: X60–84)
- (2) The main diagnosis of poisoning with weak analgesics, epileptic drugs, or carbon monoxide (ICD-10: T39, T42, T43, and T58)
- (3) Hospital contacts where the primary diagnosis is a psychiatric disorder (any from the ICD-10 F chapter and 290–315 in ICD-8) and the secondary diagnosis is intoxication (ICD-10: T36–T50 and T52–T60) or lesions at the forearm, wrist, or hand (ICD-10: S51, S55, S59, S61, S65, and S69)

### **Reference**

1. Gasse C, Danielsen AA, Pedersen MG, Pedersen CB, Mors O, Christensen J. Positive predictive value of a register-based algorithm using the Danish National Registries to identify suicidal events. *Pharmacoepidemiol Drug Saf.* 2018;27(10):1131-1138.
