# Supplementary material for: Antidepressant discontinuation before or during pregnancy and risk of psychiatric emergency in Denmark: A population-based propensity score–matched cohort study
Source: PubMed Central journal article supplement (PMC8843130; doi:10.1371/journal.pmed.1003895), 2022-01-31
Supplement: pmed.1003895.s005.pdf [file pmed.1003895.s005.pdf]

**S1 Table. The ICD-8 or ICD-10 codes for subgroup diagnosis of psychiatric comorbidities.**

| <b>Name of disorders or medications</b>                                                      | <b>ICD-8 codes</b>                                                                 | <b>ICD-10 codes</b>       |
|----------------------------------------------------------------------------------------------|------------------------------------------------------------------------------------|---------------------------|
| Any psychiatric disorders                                                                    | 290–309                                                                            | F00–F99 excluding F70–F79 |
| Substance abuse disorder                                                                     | 291.X9, 294.39, 303.X9, 303.20, 303.28, 303.90, and 304.X9                         | F10–F19                   |
| Schizophrenia and related disorders, abbreviated hereafter as schizophrenia                  | 295.X9, 296.89, 297.X9, 298.29–298.99, 299.04, 299.05, 299.09, and 301.83          | F20–F29                   |
| Bipolar disorder                                                                             | 296.19, 296.39, and 298.19                                                         | F30–31                    |
| Depression                                                                                   | 296.09, 296.29, 298.09, and 300.49                                                 | F32–33                    |
| Other mood disorders except for bipolar and unipolar disorders;                              | 296.X9 and 301.19 excluding 296.09, 296.19, 296.29, and 296.39                     | F34–39                    |
| Neurotic, stress-related, and somatoform disorders                                           | 300.X9, 305.X9, 305.68, and 307.99 excluding 300.49                                | F40–F48                   |
| Personality disorders                                                                        | 300.19, 301.49, 301.59, 301.69, 301.79, 301.80, 301.81, 301.82, 301.83, and 301.84 | F60–F69                   |
| Behavioral and emotional disorders with onset usually occurring in childhood and adolescence | 306.X9, and 308.0X                                                                 | F90–F98                   |
