# Supplementary material for: Antidepressant discontinuation before or during pregnancy and risk of psychiatric emergency in Denmark: A population-based propensity score–matched cohort study
Source: PubMed Central journal article supplement (PMC8843130; doi:10.1371/journal.pmed.1003895), 2022-01-31
Supplement: pmed.1003895.s009.pdf [file pmed.1003895.s009.pdf]

**S5 Table. Risk of psychiatric emergency associated with antidepressant discontinuation in propensity score matched cohort analyses using a less restrictive 30 days grace period.<sup>a</sup>**

| Matched groups according to time of discontinuation of the exposed group | Antidepressant discontinuation group |              |              |                             | Antidepressant continuation group |              |              |                             | Unadjusted hazard ratios (95% CI) | Adjusted hazard ratios (95% CI) <sup>b</sup> | P-values for adjusted analyses |
|--------------------------------------------------------------------------|--------------------------------------|--------------|--------------|-----------------------------|-----------------------------------|--------------|--------------|-----------------------------|-----------------------------------|----------------------------------------------|--------------------------------|
|                                                                          | No of women                          | No of events | Person-years | Incidence/1000 person-years | No of women                       | No of events | Person-years | Incidence/1000 person-years |                                   |                                              |                                |
| <b>Antidepressant discontinuation before pregnancy</b>                   | 1,762                                | 44           | 2,194.15     | 20.1                        | 1,762                             | 63           | 2,146.80     | 29.3                        | 0.69 (0.47–1.02)                  | 0.66 (0.44–0.99)                             | 0.044                          |
| During pregnancy                                                         | 1,762                                | 20           | 1327.80      | 15.1                        | 1,762                             | 38           | 1,290.55     | 29.4                        | 0.53 (0.31–0.90)                  | 0.41 (0.22–0.79)                             | 0.008                          |
| Within 6 months postpartum                                               | 1,704                                | 23           | 847.78       | 27.1                        | 1,704                             | 24           | 846.43       | 28.4                        | 0.96 (0.53–1.72)                  | 1.00 (0.55–1.80)                             | 0.994                          |
| <b>Antidepressant discontinuation during pregnancy</b>                   | 6,446                                | 215          | 6,165.84     | 34.9                        | 6,446                             | 186          | 6,113.73     | 30.4                        | 1.18 (0.95–1.42)                  | 1.16 (0.96–1.41)                             | 0.156                          |
| During pregnancy                                                         | 6,446                                | 91           | 3,021.08     | 30.1                        | 6,446                             | 73           | 2,954.95     | 24.7                        | 1.22 (0.92–1.65)                  | 1.26 (0.93–1.72)                             | 0.138                          |
| Within 6 months postpartum                                               | 6,281                                | 121          | 3,108.97     | 38.9                        | 6,281                             | 110          | 3,115.82     | 35.3                        | 1.09 (0.83–1.41)                  | 1.08 (0.82–1.42)                             | 0.576                          |

<sup>a</sup>The numbers of during pregnancy and within 6 months postpartum do not add up to the whole period since only matched individuals contribute to the analyses; <sup>b</sup> adjustment for imbalanced variables: level of education status and the use of TCAs or MAOIs in the 90 days before pregnancy for the estimate of antidepressant discontinuation before pregnancy; the level of education and age at first affective disorder for the estimate of antidepressant discontinuation during pregnancy.
