# Supplementary material for: Antidepressant discontinuation before or during pregnancy and risk of psychiatric emergency in Denmark: A population-based propensity score–matched cohort study
Source: PubMed Central journal article supplement (PMC8843130; doi:10.1371/journal.pmed.1003895), 2022-01-31
Supplement: pmed.1003895.s010.pdf [file pmed.1003895.s010.pdf]

**S6 Table. Risk of psychiatric emergency associated with antidepressant discontinuation in propensity score-matched cohort analyses including age at pregnancy and age at first affective disorders as linear splines.**

| Matched groups according to time of discontinuation of the exposed group | Antidepressant discontinuation group |              |              |                              | Antidepressant continuation group |              |              |                              | Unadjusted hazard ratios (95% CI) | Adjusted hazard ratios (95% CI) <sup>b</sup> | P-values for the adjusted analyses |
|--------------------------------------------------------------------------|--------------------------------------|--------------|--------------|------------------------------|-----------------------------------|--------------|--------------|------------------------------|-----------------------------------|----------------------------------------------|------------------------------------|
|                                                                          | No of women                          | No of events | Person-years | Incidence /1000 person-years | No of women                       | No of events | Person-years | Incidence /1000 person-years |                                   |                                              |                                    |
| <b>Antidepressant discontinuation before pregnancy</b>                   | 2,635                                | 75           | 3,268.74     | 22.9                         | 2,635                             | 89           | 3,221.03     | 27.6                         | 0.83 (0.61–1.14)                  | 0.81 (0.58–1.14)                             | 0.231                              |
| During pregnancy                                                         | 2,635                                | 38           | 1,978.26     | 19.2                         | 2,635                             | 48           | 1,936.12     | 24.8                         | 0.79 (0.52–1.21)                  | 0.78 (0.50–1.22)                             | 0.269                              |
| Within 6 months postpartum                                               | 2,549                                | 35           | 1,266.97     | 27.6                         | 2,549                             | 40           | 1,265.97     | 31.6                         | 0.91 (0.55–1.50)                  | 0.93 (0.53–1.61)                             | 0.789                              |
| <b>Antidepressant discontinuation during pregnancy</b>                   | 5,438                                | 194          | 5,313.85     | 36.5                         | 5,438                             | 158          | 5,279.72     | 29.9                         | 1.28 (1.03–1.58)                  | 1.27 (1.01–1.59)                             | 0.040                              |
| During pregnancy                                                         | 5,438                                | 82           | 2,665.30     | 30.8                         | 5,438                             | 61           | 2,615.64     | 23.3                         | 1.40 (1.00–1.96)                  | 1.48 (1.03–2.12)                             | 0.033                              |
| Within 6 months postpartum                                               | 5,295                                | 109          | 2,619.56     | 41.6                         | 5,295                             | 96           | 2,624.95     | 36.6                         | 1.24 (0.92–1.68)                  | 1.18 (0.85–1.64)                             | 0.316                              |

<sup>a</sup> The numbers of during pregnancy and within 6 months postpartum do not add up to the whole period since only matched individuals contribute to the analyses;

<sup>b</sup> adjustment for imbalanced variables: level of education status and the use of TCAs or MAOIs in the 90 days before pregnancy for the estimate of antidepressant discontinuation before pregnancy; the level of education and age at first affective disorder for the estimate of antidepressant discontinuation during pregnancy.
