# Supplementary material for: Antidepressant discontinuation before or during pregnancy and risk of psychiatric emergency in Denmark: A population-based propensity score–matched cohort study
Source: PLoS Med. 2022 Jan 31;19(1):e1003895. doi: 10.1371/journal.pmed.1003895 (PMC8843130; doi:10.1371/journal.pmed.1003895)
Supplement: S2 Table — (PDF) [file pmed.1003895.s006.pdf]

**S2 Table. Classes of antidepressant treatment during pregnancy.**

| <b>Antidepressants</b>                                                                                           | <b>ATC code</b>         |
|------------------------------------------------------------------------------------------------------------------|-------------------------|
| <b>Selective serotonin reuptake inhibitors</b>                                                                   | N06AB                   |
| Citalopram                                                                                                       | N06AB04                 |
| Sertraline                                                                                                       | N06AB06                 |
| Fluoxetine                                                                                                       | N06AB03                 |
| Paroxetine                                                                                                       | N06AB05                 |
| Escitalopram                                                                                                     | N06AB10                 |
| Fluvoxamine                                                                                                      | N06AB08                 |
| More than one SSRI                                                                                               | -                       |
| <b>Serotonin-norepinephrine reuptake inhibitors</b>                                                              | N06AX                   |
| <b>Tricyclic antidepressants and others</b> (e.g., monoamine oxidase inhibitors and tetracyclic antidepressants) | N06AA, N06AG, and N06AF |
